# Supplementary material for: Mapping the human epigenetic landscape across three generations: A DNA methylation resource from TMM BirThree
Source: Research Square preprint supplement (doi:10.21203/rs.3.rs-7314319/v1), 2025-08-20
Supplement: Supplementary file 1 [file 090a38c6a46185ef48731d3a.xlsx]

## Sheet: Table 1.
Table 1. Clinical characteristics based on medical records of newborns and their mothers
Sex, n (%)
	Boys		84	(54.2)
	Girls		71	(45.8)
Delivery week, n (%)
	Preterm (<37 w)		6	(3.9)
	Normal term (37 w-<42 w)		149	(96.1)
	Postmature (≧42 w)		0	(0)
Delivery week, mean (SD)			39.22 ± 1.4
Birthweight, n (%)
	≧2500 g		141	(91.0)
	<2500 g		12	(7.7)
	out of range (≦mean -3SD or ≧mean+3SD)		2	(1.3)
Birthweight (g), mean (SD)			3078.0 ± 397.6
Fetal count and chorionicity
	Singleton		153	(98.7)
	Dichorionic diamniotic twins		2	(9.0)
	Monochorionic diamniotic twins		0	(0)
	Monochorionic monoamniotic twins		0	(0)
	Triplets		0	(0)
Apgar Score (1 min), mean (SD)			8.2 ± 0.8
Apgar Score (5 min), mean (SD)			9.1 ± 0.6
Asphyxia, n (%)
	Yes		4	(2.6)
	No		130	(83.9)
	Missing		21	(13.5)
Resuscitation, n (%)
	Yes		14	(9.0)
	No		119	(76.8)
	Missing		22	(14.2)
Hospitalisation, n (%)
	None		130	(83.9)
	Neonatal Intensive Care Unit		9	(5.8)
	Paediatric hospitalisation		12	(7.7)
	Growing Care Unit		4	(2.6)
Mode of conception, n (%)
	Natural conception, n (%)		141	(91.0)
	Assisted reproductive technique, n (%)		14	(9.0)
		– Ovulation induction	3
		– Intrauterine insemination	3
		– In vitro fertilization	6
		– Intracytoplasmic sperm injection	2
w, weeks.
