# Supplementary material for: Mapping the human epigenetic landscape across three generations: A DNA methylation resource from TMM BirThree
Source: Research Square preprint supplement (doi:10.21203/rs.3.rs-7314319/v1), 2025-08-20
Supplement: Supplementary file 2 [file 28b24ff975f55da9934cddff.xlsx]

## Sheet: Table 2.
Table 2. Characteristics of pregnant women (mother), fathers, and grandparents on available self-reported questionnaires at environment
		Mother (n=158)		Father (n=158)		Maternal grandmother (n=157)		Maternal grandfather (n=156)		Paternal grandmother (n=155)		Paternal grandfather (n=154)
Educational attainment, n (%)
	High school graduate or less	17	(10.8)	40	(25.3)	89	(56.7)	95	(60.9)	91	(58.7)	93	(60.4)
	Junior college or vocational college graduate	51	(32.3)	39	(24.7)	50	(31.8)	18	(11.5)	50	(32.3)	16	(10.4)
	University graduate or above	62	(39.2)	70	(44.3)	13	(8.3)	36	(23.1)	11	(7.1)	42	(27.3)
	Other	1	(0.6)	0	(0)	0	(0)	2	(1.3)	1	(0.6)	0	(0)
	Missing	27	(17.1)	9	(5.7)	5	(3.2)	5	(3.2)	2	(1.3)	3	(1.9)
Household income, n (%)
	< 4,000,000 (JPY/year)	37	(23.4)	ND		55	(35.0)	56	(35.9)	55	(35.5)	60	(39.0)
	4,000,000 - 5,999,999 (JPY/year)	62	(39.2)	ND		32	(20.4)	43	(27.6)	31	(20.0)	41	(26.6)
	≥ 6,000,000 (JPY/year)	50	(31.6)	ND		44	(28.0)	47	(30.1)	45	(29.0)	42	(27.3)
	Missing	9	(5.7)	158	(100)	26	(16.6)	10	(6.4)	24	(15.5)	11	(7.1)
BMI, n (%)
	BMI <18.5 kg/m2	17	(10.8)	5	(3.2)	10	(6.4)	3	(1.9)	7	(4.5)	1	(0.6)
	BMI 18.5 kg/m2 – <25.0 kg/m2	119	(75.3)	99	(62.7)	103	(65.5)	92	(59.0)	111	(71.6)	81	(52.6)
	BMI ≧25.0 kg/m2	20	(12.7)	46	(29.1)	41	(26.1)	58	(37.2)	34	(21.9)	69	(44.8)
	Missing	2	(1.3)	8	(5.1)	3	(1.9)	3	(1.9)	3	(1.9)	3	(1.9)
Living with spouse
	Yes	149	(94.3)	147	(93.0)	143	(91.1)	146	(93.6)	147	(94.8)	144	(93.5)
	No	9	(5.7)	3	(1.9)	11	(7.0)	7	(4.5)	7	(4.5)	9	(5.8)
	Missing	0	(0)	8	(5.1)	3	(1.9)	3	(1.9)	1	(0.6)	1	(0.6)
Work METS (h/week) (Mean±SD)		17.1 ± 9.6		20.9 ± 15.6		19.7 ± 11.0		20.2 ± 14.6		20.3 ± 11.3		18.9 ± 13.3
	Missing, n (%)	29	(18.4)	8	(5.1)	6	(3.8)	9	(5.8)	9	(5.8)	8	(5.2)
Lesure METS (h/week) (Mean±SD)		1.5 ± 2.8		1.9 ± 4.6		2.4 ± 4.2		2.8 ± 3.9		2.6 ± 3.4		2.2 ± 3.3
	Missing, n (%)	28	(17.7)	9	(5.7)	3	(1.9)	12	(7.7)	5	(3.2)	7	(4.5)
Smoking status, n (%)
	Never smoker	123	(77.8)	59	(37.3)	127	(80.9)	30	(19.2)	128	(82.6)	28	(18.2)
	Ex-smoker	35	(22.2)	47	(29.7)	16	(10.2)	92	(59.0)	17	(11.0)	79	(51.3)
	Current smoker	0	(0)	44	(27.8)	7	(4.5)	27	(17.3)	7	(4.5)	46	(29.9)
	Missing	0	(0)	8	(5.1)	7	(4.5)	7	(4.5)	3	(1.9)	1	(0.6)
Alcohol drinking, n (%)
	Contitutionally never drinker	12	(7.6)	6	(3.8)	4	(2.5)	4	(2.6)	8	(5.2)	5	(3.2)
	Never drinker	55	(34.8)	24	(15.2)	73	(46.5)	15	(9.6)	68	(43.9)	22	(14.3)
	Past drinker	53	(33.5)	0	(0)	2	(1.3)	3	(1.9)	1	(0.6)	4	(2.6)
	Current drinker	38	(24.1)	119	(75.3)	72	(45.9)	130	(83.3)	74	(47.7)	122	(79.2)
	Missing	0	(0)	9	(5.7)	6	(3.8)	4	(2.6)	4	(2.6)	1	(0.6)
K6 Questionnaire
	< 5 points	121	(76.6)	95	(60.1)	99	(63.1)	121	(77.6)	103	(66.5)	111	(72.1)
	5-10 points: Requires observation	23	(14.6)	30	(19.0)	35	(22.3)	27	(17.3)	38	(24.5)	30	(19.5)
	≥ 10 points: Requires attention	13	(8.2)	24	(15.2)	20	(12.7)	5	(3.2)	8	(5.2)	9	(5.8)
	Missing	1	(0.6)	9	(5.7)	3	(1.9)	3	(1.9)	6	(3.9)	4	(2.6
CES-D Questionnaire
	< 16 points	ND		123	(77.8)	113	(72.0)	127	(81.4)	118	(76.1)	112	(72.7)
	16-20 points: mild depression	ND		16	(10.1)	16	(10.2)	9	(5.8)	10	(6.5)	16	(10.4)
	21-25 points: moderate depression	ND		6	(3.8)	6	(3.8)	1	(0.6)	3	(1.9)	1	(0.6)
	≥ 26 points: severe depression	ND		4	(2.5)	5	(3.2)	2	(1.3)	3	(1.9)	2	(1.3)
	Missing	158	(100)	9	(5.7)	17	(10.8)	17	10.9)	21	(13.5)	13	(8.4)
AIS Questionnaire
	0-3 points	64	(40.5)	87	(55.1)	79	(50.3)	100	(64.1)	97	(62.6)	112	(72.7)
	4-5 points: slight possibility of insomnia	43	(27.2)	29	(18.4)	27	(17.2)	30	(19.2)	24	(15.5)	22	(14.3)
	≥ 6 points: high possibility of insomnia	50	(31.6)	33	(20.9)	44	(28.0)	19	(12.1)	27	(17.4)	16	(10.4)
	Missing	1	(0.6)	9	(5.7)	7	(4.5)	7	(4.5)	7	(4.5)	4	(2.6)
