# Supplementary material for: Mapping the human epigenetic landscape across three generations: A DNA methylation resource from TMM BirThree
Source: Research Square preprint supplement (doi:10.21203/rs.3.rs-7314319/v1), 2025-08-20
Supplement: Supplementary file 3 [file 44eea60493b5b97e10246392.xlsx]

## Sheet: Sup Table 3.
Supplemental Table 3. Summary of smoking-related characteristics among 153 grandmother–mother–newborn triads
Mothers				N (%) or Mean ± SD
Smoking information available				153 (100%)
Never smokers				119 (77.8%)
Former smokers (quit before pregnancy)				29 (19.0%)
	– With ≥1 year of smoking history prior to pregnancy			27
	– With less than 1 year of smoking history prior to pregnancy			2
	Smoking duration before pregnancy (years)			5.8 ± 3.4
	Years since smoking cessation before pregnancy			7.1 ± 3.9 †
Former smokers (quit after pregnancy)				5 (3.3%)
Current smokers during pregnancy				0 (0%)
Mother's Partner (Child’s Father)
Smoking information available				153 (100%)
Never smoker				65 (36.6%)
Smoker during early pregnancy				43 (36.6%)
	– Quit after pregnancy awareness			3
	– Continued smoking			40
Smoker who quit before pregnancy				45 (29.4%)
Maternal Grandmothers
Smoking information available				146 (95.4%)
Never smokers				123 (80.3%)
Ever smokers (current or former)				23 (15.0%)
	Initiated smoking prior to pregnancy			16 ††
		– Smokers		12
			Smoking during pregnancy	Unknown
		– Former smokers (quit before or during pregnancy)		4
			Years since smoking cessation before pregnancy	2.5 ± 1.9 †††
		Smoking duration before pregnancy (years)		5.4 ± 3.3
	Initiated smoking after pregnancy			7
† 21 former smoker had ceased smoking more than 5 years prior to pregnancy. †† All maternal grandmothers who initiated smoking before pregnancy and had ≥1 year of smoking history prior to conception. ††† One former smoker had ceased smoking more than 5 years prior to pregnancy. "
