# Supplementary material for: Mapping the human epigenetic landscape across three generations: A DNA methylation resource from TMM BirThree
Source: Research Square preprint supplement (doi:10.21203/rs.3.rs-7314319/v1), 2025-08-20
Supplement: Supplementary file 4 [file 5e8fc96b6b070a1869c38dd4.xlsx]

## Sheet: SupTable5
Supplemental Table 5. Differentially methylated CpG sites with p < 1×10⁻5 in the maternal grandmather's smoking EWAS (Neonatal EWAS2) using DNA from 137 newborns
Chromosome	Position	p-value		Gene	RefSeq ID	CpG Island	TSS Distance (bp)
3	127141653	1.07142e-06		NA	NA	No	32140
16	88150200	1.40111e-06		NA	NA	No	39276
20	62802567	1.91241e-06		MYT1	NM_004535	No	0
2	236293568	1.95509e-06		NA	NA	Yes	109163
2	111432542	1.96335e-06		BUB1	NM_001278617	No	0
7	154982553	2.26276e-06		NA	NA	No	103451
7	1216035	2.50496e-06		NA	NA	No	10441
11	2440172	3.86659e-06		TRPM5	NM_014555	No	0
1	22214728	4.06044e-06		HSPG2	NM_005529	No	0
7	37738008	4.14059e-06		NA	NA	No	41986
8	32078528	4.3437e-06		NRG1	NM_013962	No	0
5	1273573	4.36606e-06		TERT	NM_001193376	No	0
5	150534157	5.15532e-06		ANXA6	NM_001155	No	0
11	65553875	5.34731e-06		NA	NA	Yes	628
10	50946926	5.77474e-06		OGDHL	NM_018245	No	0
9	140617555	7.06886e-06		EHMT1	NM_024757	No	0
2	65660677	7.77246e-06		NA	NA	No	1021
12	132860966	8.24341e-06		GALNT9	NM_001122636	No	0
22	46307914	8.45422e-06		NA	NA	No	8332
The genomic coordinates are based on the human genome assembly hg19 (GRCh37). The p-value represents the significance after multiple testing correction, with Bonferroni-adjusted significant sites marked by an asterisk (*). The CpG Island column (Yes/No) indicates whether the site is located within a CpG island. The TSS Distance (bp) column represents the distance from the nearest transcription st…
