# Supplementary material for: Mapping the human epigenetic landscape across three generations: A DNA methylation resource from TMM BirThree
Source: Research Square preprint supplement (doi:10.21203/rs.3.rs-7314319/v1), 2025-08-20
Supplement: Supplementary file 5 [file 7f81fa0d60fcc3eb92cb2113.xlsx]

## Sheet: SupTableS2
Supplemental Table 2. Summary statistics forWGBS, mapping, and CpG coverage.
	Average	±	SD
n	15
Number of raw reads	875634794	±	11918576
Number of mapped reads	814608453	±	11928867
Remained reads after clipping process	690302721	±	13247789
PCR amplicom of duplicated reads (%)	15.25	±	1.42
Insert size of sequencing fragments (bp)	237	±	9
Number of detected CpGs (1× <= depth) in any DNA strands	54542033	±	98999
Number of detected CpGs (1× <= depth) in both DNA strands	27566237	±	51474
Number of detected CpGs (6× <= depth) in both DNA strands	27178421	±	42687
Raw coverages	36.36	±	0.56
Mapped reads coverages	23.3	±	0.83
Abbreviations: nRBCs, nucleated red blood cells; SD, standard deviation; WGBS, whole genome bisulfite sequencing.
