# Supplementary material for: Mapping the human epigenetic landscape across three generations: A DNA methylation resource from TMM BirThree
Source: Research Square preprint supplement (doi:10.21203/rs.3.rs-7314319/v1), 2025-08-20
Supplement: Supplementary file 6 [file 8200f75b528721a90b103c3c.xlsx]

## Sheet: SupTable1
Supplemental Table 1. Summary statistics for capture-based sequencing, mapping, and CpG coverage.
	Newborn	Mother	Father	Maternal grandmother	Maternal grandfather	Paternal grandmother	Paternal grandfather		Newborn male	Newborn female	Adult male	Adult female
n	155	158	158	157	156	155	154		84	71	468	470
Sequencing summary
raw read, n	30096846.5 ± 2574234.7	31605228.4 ± 2123525.1	31512728.6 ± 2405528.6	31493594.8 ± 2669602.0	31488449.8 ± 2298008.7	31628541.4 ± 2510557.5	31432526.4 ± 2397327.0		30145375.3 ± 2706808.9	30039432.1 ± 2425907.7	31478244.3 ± 2362658.3	31575626.4 ± 2439905.3
read filtered by , n	29939220.8 ± 2560587.3	31439976.7 ± 2114480.0	31384037.8 ± 2398803.6	31363177.8 ± 2677916.8	31356359.2 ± 2297414.9	31504098.2 ± 2514167.2	31302940.8 ± 2389712.9		29992088.3 ± 2694104.9	29876673.2 ± 2410614.2	31348125.8 ± 2357636.8	31435469.1 ± 2441493.5
Mapping summary
mapped read to reference genome, n	28137308.1 ± 2444951.3	29538832.9 ± 1981417.0	29562764.7 ± 2190999.1	29516605.1 ± 2488605.3	29499479.3 ± 2150449.3	29647276.4 ± 2348789.6	29480348.9 ± 2237667.5		28192927.7 ± 2559273.2	28071504.7 ± 2318780.3	29514549.8 ± 2188709.4	29567171.2 ± 2277931.9
%	94.0 ± 1.0	94.0 ± 0.9	94.2 ± 0.9	94.1 ± 0.8	94.1 ± 0.8	94.1 ± 0.8	94.2 ± 0.8		94.0 ± 0.9	93.9 ± 1.0	94.2 ± 0.8	94.1 ± 0.8
On-target mapping rate, %	55.7 ± 0.8	55.6 ± 1.6	55.3 ± 1.2	54.9 ± 0.9	55.2 ± 1.1	55.0 ± 0.9	55.2 ± 1.1		55.7 ± 0.8	55.7 ± 08	55.2 ± 1.1	55.2 ± 1.2
PCR duplicate rate, %	6.5 ± 2.1	7.0 ± 4.6	7.0 ± 1.9	7.2 ± 1.8	7.0 ± 2.3	6.9 ± 1.7	7.1 ± 2.3		6.2 ± 1.4	6.9 ± 2.6	7.0 ± 2.2	7.1 ± 3.0
CpG summary
CpG with 6 ≦ depth ≦ 1000, n	1226518.7 ± 25444.3	1227737.7 ± 22837.1	1219006.3 ± 23351.1	1218778.5 ± 24748.5	1220935.1 ± 22554.7	1221435.8 ± 26431.0	1222136.0 ± 22282.4		1229151.7 ± 24328.0	1223403.7 ± 26540.2	1220679.1 ± 22726.6	1222666.7 ± 24938.5
CpG with CR=100%, n	822290	818642	814991	821283	815038	824430	815445		865479	863521	759328	749718
Mean Depth, ×	26.2 ± 2.4	26.9 ± 2.0	26.8 ± 2.0	26.5 ± 2.3	26.7 ± 1.9	26.9 ± 2.2	26.7 ± 2.1		26.4 ± 2.5	26.1 ± 2.3	26.7 ± 2.0	26.8 ± 2.2
Target region coverage at ≥1× , %	98.0 ± 0.2	98.0 ± 0.2	97.9 ± 0.2	97.9 ± 0.2	98.0 ± 0.2	98.0 ± 0.2	98.0 ± 0.2		98.1 ± 0.3	98.0 ± 0.3	98.0 ± 0.2	98.0 ± 0.3
Target region coverage at ≥10× , %	73.9 ± 2.3	74.1 ± 2.1	73.5 ± 1.9	73.3 ± 2.2	73.6 ± 1.8	73.6 ± 2.2	73.6 ± 2.0		74.1 ± 2.4	73.8 ± 2.3	73.6 ± 1.9	737.7 ± 2.2
Target region coverage at ≥20× , %	50.6 ± 4.0	51.2 ± 3.5	50.8 ± 3.0	50.3 ± 3.6	50.7 ± 2.9	50.8 ± 3.5	50.7 ± 3.3		50.9 ± 4.2	50.4 ± 3.9	50.8 ± 3.1	50.8 ± 3.6
means ± SD, CR: call rate.
