# Supplementary material for: Mapping the human epigenetic landscape across three generations: A DNA methylation resource from TMM BirThree
Source: Research Square preprint supplement (doi:10.21203/rs.3.rs-7314319/v1), 2025-08-20
Supplement: Supplementary file 7 [file 9009b08c93e49f588e64e6f2.xlsx]

## Sheet: SupTable6
Supplemental Table 6. Differentially methylated CpG sites with p < 1×10⁻5 in the smoking EWAS (Grandparental EWAS1) using DNA from 385 grandparents
Chromosome	Position	p-value		Gene	RefSeq ID	CpG Island	TSS Distance (bp)
2	149824190	9.13503e-29	*	KIF5C	NM_004522	No	0
19	17000390	1.08599e-22	*	F2RL3	NM_003950	No	0
2	149824208	5.74542e-22	*	KIF5C	NM_004522	No	0
5	373651	1.88902e-19	*	AHRR	NM_001242412	No	0
2	149824184	5.08536e-19	*	KIF5C	NM_004522	No	0
6	30720080	1.80702e-17	*	NA	NA	No	7753
11	69477522	5.08696e-17	*	NA	NA	No	2808
2	233284840	1.03337e-16	*	NA	NA	Yes	9416
5	373653	2.50007e-15	*	AHRR	NM_001242412	No	0
11	69477520	7.54002e-15	*	NA	NA	No	2810
7	146334665	1.16156e-14	*	CNTNAP2	NM_014141	No	0
1	206223150	1.19372e-14	*	NA	NA	No	1131
2	233285012	4.32404e-14	*	NA	NA	Yes	9588
1	206223050	2.33654e-13	*	NA	NA	No	1231
6	683940	8.9142e-13	*	EXOC2	NM_018303	No	0
9	75816100	1.41117e-12	*	NA	NA	No	30793
19	17000346	1.64553e-12	*	F2RL3	NM_003950	No	0
17	78830673	2.3589e-12	*	RPTOR	NM_020761	No	0
19	17000415	9.09802e-12	*	F2RL3	NM_003950	No	0
14	74224883	1.64034e-11	*	MIDEAS	NM_001043318	No	0
8	42040344	2.49775e-11	*	PLAT	NM_000930	No	0
22	39861509	7.6542e-11	*	MGAT3	NM_002409	No	0
3	98274153	1.06389e-10	*	NA	NA	No	22159
2	233284934	1.15239e-10	*	NA	NA	Yes	9510
19	49379057	1.61217e-10	*	PPP1R15A	NM_014330	No	0
19	17000336	1.91248e-10	*	F2RL3	NM_003950	No	0
22	39861574	2.56417e-10	*	MGAT3	NM_002409	No	0
19	17000413	4.84452e-10	*	F2RL3	NM_003950	No	0
8	42040349	5.16381e-10	*	PLAT	NM_000930	No	0
2	233284789	6.8256e-10	*	NA	NA	Yes	9365
18	3179889	8.83686e-10	*	MYOM1	NM_003803	No	0
19	49379177	9.5675e-10	*	PPP1R15A	NM_014330	No	0
2	233246651	1.5724e-09	*	ALPP	NM_001632	No	0
7	145814670	1.71113e-09	*	CNTNAP2	NM_014141	No	0
22	39861490	2.03451e-09	*	MGAT3	NM_002409	No	0
2	233285022	3.62053e-09	*	NA	NA	Yes	9598
1	92947752	6.76582e-09	*	GFI1	NM_001127215	Yes	0
1	247702960	7.4051e-09	*	GCSAML	NM_001281853	No	0
2	233284501	8.09483e-09	*	NA	NA	Yes	9077
17	78830659	8.30422e-09	*	RPTOR	NM_020761	No	0
2	233284453	9.37281e-09	*	NA	NA	Yes	9029
1	92947588	1.17889e-08	*	GFI1	NM_001127215	Yes	0
2	233283265	1.3805e-08	*	NA	NA	No	7841
6	683927	1.39753e-08	*	EXOC2	NM_018303	No	0
9	102067699	1.40738e-08	*	NA	NA	No	49921
2	178125956	1.83242e-08	*	NFE2L2	NM_006164	No	0
8	141801307	2.76536e-08	*	PTK2	NM_005607	No	0
17	78830726	2.77511e-08	*	RPTOR	NM_020761	No	0
7	146334650	2.81633e-08	*	CNTNAP2	NM_014141	No	0
3	98272097	2.98363e-08	*	NA	NA	No	20103
1	92947586	3.10071e-08	*	GFI1	NM_001127215	Yes	0
5	408272	3.10175e-08	*	AHRR	NM_001242412	No	0
2	220317977	3.73318e-08	*	SPEG	NM_005876	No	0
19	49379145	3.86215e-08	*	PPP1R15A	NM_014330	No	0
1	206224334	3.9981e-08	*	AVPR1B	NM_000707	No	0
2	233283010	4.09557e-08	*	NA	NA	No	7586
12	53613078	4.18363e-08	*	RARG	NM_001243731	No	0
2	233284446	4.80433e-08	*	NA	NA	Yes	9022
9	127048842	4.98964e-08	*	NEK6	NM_001145001	No	0
1	92947412	5.25826e-08	*	GFI1	NM_001127215	Yes	0
21	45342026	5.91903e-08		AGPAT3	NM_020132	No	0
8	42040326	6.26577e-08		PLAT	NM_000930	No	0
12	64482499	7.33423e-08		SRGAP1	NM_020762	No	0
11	86512223	8.01357e-08		PRSS23	NM_007173	No	0
7	139320272	8.48053e-08		HIPK2	NM_001113239	No	0
19	49379039	8.6513e-08		PPP1R15A	NM_014330	No	0
1	206223115	8.94904e-08		NA	NA	No	1166
5	346963	9.49885e-08		AHRR	NM_001242412	No	0
5	393075	9.54431e-08		AHRR	NM_001242412	No	0
7	146478635	9.77175e-08		CNTNAP2	NM_014141	No	0
8	142416618	1.03024e-07		NA	NA	No	14868
1	92947559	1.18664e-07		GFI1	NM_001127215	Yes	0
12	4525458	1.19063e-07		NA	NA	No	17848
14	94812750	1.48461e-07		NA	NA	No	17223
22	39861636	1.56794e-07		MGAT3	NM_002409	No	0
19	12266453	1.65345e-07		ZNF625	NR_037801	No	0
1	15485263	1.70288e-07		TMEM51	NM_018022	No	0
3	98251792	1.78666e-07		GPR15	NM_005290	No	0
12	64482512	1.93209e-07		SRGAP1	NM_020762	No	0
3	98255899	2.20678e-07		NA	NA	No	3905
1	233735690	2.36135e-07		NA	NA	No	14058
14	90280211	2.37284e-07		EFCAB11	NM_001284269	No	0
12	53613182	2.58196e-07		RARG	NM_001243731	No	0
9	72659798	2.66656e-07		MAMDC2	NM_153267	No	0
16	15601488	2.83908e-07		BMERB1	NM_033201	No	0
19	34662513	2.95557e-07		NA	NA	No	837
19	49379222	3.18146e-07		PPP1R15A	NM_014330	No	0
1	9472816	3.43663e-07		NA	NA	No	12335
7	45020313	3.49707e-07		NA	NA	No	1609
9	127048821	3.5862e-07		NEK6	NM_001145001	No	0
4	141390970	3.76955e-07		MGAT4D	NM_001277353	No	0
16	72882495	3.78522e-07		ZFHX3	NM_001164766	No	0
4	57629220	3.91748e-07		NA	NA	No	46804
14	106328948	4.22067e-07		NA	NA	No	54888
7	147012527	4.47646e-07		MIR548I4	NR_031690	No	0
14	106352071	4.4917e-07		NA	NA	No	31765
19	10218023	4.51136e-07		PPAN	NM_020230	No	0
3	98255937	4.66502e-07		NA	NA	No	3943
21	47352896	4.72462e-07		PCBP3	NM_020528	No	0
14	106329738	5.52517e-07		NA	NA	No	54098
11	30510489	5.98256e-07		MPPED2	NM_001584	No	0
1	11123118	6.14763e-07		NA	NA	No	3027
7	97976042	6.18699e-07		BAIAP2L1	NM_018842	No	0
2	233246700	6.6977e-07		ALPP	NM_001632	No	0
12	51633594	6.90395e-07		DAZAP2	NM_001136264	No	0
1	1707697	7.02883e-07		NADK	NM_001198994	No	0
9	117008284	7.46188e-07		COL27A1	NM_032888	No	0
17	79363732	7.50228e-07		NA	NA	No	4572
10	91281025	7.80865e-07		SLC16A12	NM_213606	No	0
9	127047556	8.08298e-07		NEK6	NM_001145001	No	0
14	106329206	8.46916e-07		NA	NA	No	54630
21	45342069	8.52508e-07		AGPAT3	NM_020132	No	0
9	125163374	8.69713e-07		NA	NA	No	5392
6	16473917	9.88814e-07		ATXN1	NM_000332	No	0
7	48018508	1.00665e-06		HUS1	NM_004507	No	0
16	5446206	1.01544e-06		NA	NA	No	204962
3	98274127	1.03295e-06		NA	NA	No	22133
22	38143592	1.0355e-06		TRIOBP	NM_138632	No	0
4	185202972	1.03918e-06		NA	NA	No	59210
7	2847552	1.07513e-06		GNA12	NM_001282441	No	0
19	2093940	1.1487e-06		MOB3A	NM_130807	No	0
5	179587842	1.15318e-06		RASGEF1C	NM_175062	No	0
10	104364277	1.17375e-06		SUFU	NM_016169	No	0
1	228967124	1.18831e-06		NA	NA	No	84708
7	146334619	1.2307e-06		CNTNAP2	NM_014141	No	0
14	106329534	1.2558e-06		NA	NA	No	54302
9	135382637	1.30967e-06		CFAP77	NM_001282957	No	0
7	2847575	1.31718e-06		GNA12	NM_001282441	No	0
4	119951846	1.31926e-06		SYNPO2	NM_001286755	No	0
12	53613126	1.35603e-06		RARG	NM_001243731	No	0
9	137692050	1.40161e-06		COL5A1	NM_001278074	No	0
3	98251808	1.55616e-06		GPR15	NM_005290	No	0
2	233246647	1.5603e-06		ALPP	NM_001632	No	0
2	233284402	1.57447e-06		NA	NA	Yes	8978
7	27184427	1.66026e-06		HOXA-AS3	NR_038832	Yes	0
5	371920	1.67487e-06		AHRR	NM_001242412	No	0
21	45342080	1.73299e-06		AGPAT3	NM_020132	No	0
6	74227875	1.78653e-06		EEF1A1	NM_001402	No	0
7	155079340	1.82437e-06		NA	NA	No	10144
8	142416620	1.83573e-06		NA	NA	No	14866
3	98255879	1.84641e-06		NA	NA	No	3885
3	139989587	1.87262e-06		CLSTN2	NM_022131	No	0
11	69477544	1.87315e-06		NA	NA	No	2786
21	45342204	1.89023e-06		AGPAT3	NM_020132	No	0
6	684006	1.95766e-06		EXOC2	NM_018303	No	0
1	15485346	2.01812e-06		TMEM51	NM_018022	No	0
10	79260643	2.13725e-06		KCNMA1	NM_001161352	No	0
18	3179957	2.16449e-06		MYOM1	NM_003803	No	0
6	8065687	2.25796e-06		EEF1E1-BLOC1S5	NR_037618	No	0
7	2847477	2.2733e-06		GNA12	NM_001282441	No	0
5	19004706	2.29572e-06		NA	NA	No	468447
5	368821	2.31491e-06		AHRR	NM_001242412	No	0
1	115299321	2.35934e-06		CSDE1	NM_001242891	No	0
18	67553574	2.36579e-06		CD226	NM_006566	No	0
7	27194235	2.37752e-06		HOXA-AS3	NR_038831	No	0
14	58637931	2.46845e-06		NA	NA	No	19084
1	92947581	2.52216e-06		GFI1	NM_001127215	Yes	0
3	98251805	2.53577e-06		GPR15	NM_005290	No	0
3	186503451	2.66756e-06		EIF4A2	NM_001967	No	0
14	106329538	2.70645e-06		NA	NA	No	54298
7	2847636	2.72597e-06		GNA12	NM_001282441	No	0
19	42365275	2.77863e-06		RPS19	NM_001022	No	0
8	674132	2.80054e-06		ERICH1	NM_207332	No	0
17	25871348	2.86186e-06		KSR1	NM_014238	No	0
6	123048888	2.8971e-06		NA	NA	No	1370
1	38947144	2.92283e-06		NA	NA	No	266705
21	45342283	3.01686e-06		AGPAT3	NM_020132	No	0
22	38839960	3.04299e-06		KCNJ4	NM_152868	No	0
2	102759470	3.16625e-06		IL1R1	NM_001288706	Yes	0
5	136638457	3.18023e-06		SPOCK1	NM_004598	No	0
5	393072	3.20868e-06		AHRR	NM_001242412	No	0
3	122281881	3.25212e-06		PARP9	NM_001146104	No	0
1	11634180	3.45928e-06		NA	NA	No	35406
10	30154904	3.51018e-06		NA	NA	No	130174
22	43040888	3.62012e-06		CYB5R3	NM_007326	No	0
17	15849512	3.62504e-06		ADORA2B	NM_000676	Yes	0
7	2847554	3.63348e-06		GNA12	NM_001282441	No	0
14	90280158	3.71464e-06		EFCAB11	NM_001284269	No	0
14	93552195	3.73566e-06		ITPK1	NM_001142593	No	0
14	106610373	3.76012e-06		NA	NA	No	133894
7	110738587	3.90281e-06		LRRN3	NM_001099658	No	0
6	12544223	3.96798e-06		NA	NA	No	151637
1	94610805	4.03627e-06		NA	NA	No	23656
14	106329560	4.14082e-06		NA	NA	No	54276
7	26578035	4.21425e-06		KIAA0087	NR_022006	No	0
14	106329901	4.30274e-06		NA	NA	No	53935
7	139320279	4.56183e-06		HIPK2	NM_001113239	No	0
12	127970297	4.59825e-06		NA	NA	No	145680
5	123149907	4.59879e-06		NA	NA	No	197169
5	2146890	4.64303e-06		NA	NA	No	156942
19	49379196	4.69519e-06		PPP1R15A	NM_014330	No	0
5	175136487	4.76214e-06		NA	NA	No	23242
2	8343775	4.79517e-06		LINC00299	NR_034135	No	0
4	83464048	5.06613e-06		TMEM150C	NM_001080506	No	0
1	15485409	5.07904e-06		TMEM51	NM_018022	No	0
7	32021782	5.32096e-06		PDE1C	NM_001191057	No	0
1	79085586	5.32207e-06		NA	NA	No	500
5	151239431	5.36963e-06		GLRA1	NM_001146040	No	0
6	145310035	5.3741e-06		NA	NA	No	135865
2	69345065	5.39492e-06		ANTXR1	NM_032208	No	0
12	4417232	5.42478e-06		NA	NA	No	2710
5	94530081	5.46785e-06		MCTP1	NM_024717	No	0
12	11870664	5.59265e-06		ETV6	NM_001987	No	0
7	29100525	5.6223e-06		CPVL	NM_031311	No	0
14	106329319	5.65024e-06		NA	NA	No	54517
9	139490463	5.65679e-06		NA	NA	No	49752
3	186543390	5.70548e-06		NA	NA	No	17071
15	65588895	5.7294e-06		NA	NA	No	9877
3	189667987	5.77599e-06		NA	NA	No	6528
22	39861570	5.78965e-06		MGAT3	NM_002409	No	0
1	15481541	5.83384e-06		TMEM51	NM_018022	No	0
17	79363674	5.87767e-06		NA	NA	No	4514
1	37875818	5.89657e-06		NA	NA	No	44660
8	10922206	6.08543e-06		XKR6	NM_173683	No	0
1	15485331	6.12656e-06		TMEM51	NM_018022	No	0
8	143111554	6.1896e-06		NA	NA	No	146144
22	51058587	6.24287e-06		NA	NA	No	2593
15	101904544	6.3546e-06		PCSK6	NM_138319	No	0
7	2847412	6.52477e-06		GNA12	NM_001282441	No	0
10	33679343	6.52721e-06		NA	NA	No	55510
5	403307	6.58518e-06		AHRR	NM_001242412	No	0
17	35149263	6.67575e-06		NA	NA	No	145507
1	87800528	6.75422e-06		LMO4	NM_006769	No	0
7	2847588	6.786e-06		GNA12	NM_001282441	No	0
12	11898284	6.83804e-06		ETV6	NM_001987	No	0
1	77912598	6.85612e-06		AK5	NM_012093	No	0
20	9261393	6.98828e-06		PLCB4	NM_182797	No	0
6	36645812	7.19269e-06		CDKN1A	NM_078467	No	0
20	62114367	7.24907e-06		NA	NA	No	4996
14	69997321	7.35851e-06		NA	NA	No	2106
7	2847528	7.38101e-06		GNA12	NM_001282441	No	0
8	128378218	7.38553e-06		NA	NA	No	34424
15	55068972	7.39145e-06		NA	NA	No	148166
2	201987715	7.44172e-06		CFLAR	NM_001127183	No	0
8	142416713	7.60753e-06		NA	NA	No	14773
3	122281975	7.64408e-06		PARP9	NM_001146104	No	0
7	26193627	7.67729e-06		NFE2L3	NM_004289	No	0
6	683999	7.83775e-06		EXOC2	NM_018303	No	0
14	69997287	8.03735e-06		NA	NA	No	2072
16	69167420	8.04915e-06		UTP4	NM_032830	No	0
2	231843428	8.18193e-06		NA	NA	No	5653
14	106330326	8.21815e-06		NA	NA	No	53510
6	74227654	8.34681e-06		EEF1A1	NM_001402	No	0
14	106681449	8.46485e-06		NA	NA	No	62818
7	42275375	8.52865e-06		GLI3	NM_000168	No	0
8	128972681	8.56598e-06		PVT1	NR_003367	No	0
11	86510871	8.58402e-06		NA	NA	No	618
1	204215196	8.71187e-06		PLEKHA6	NM_014935	No	0
11	128773278	8.73077e-06		KCNJ5-AS1	NM_001256088	No	0
6	24031603	8.73421e-06		NA	NA	No	94809
2	97009983	8.77548e-06		NCAPH	NM_001281710	No	0
5	75508929	8.82514e-06		SV2C	NM_014979	No	0
6	28661786	8.85425e-06		NA	NA	No	106674
15	65588879	8.98391e-06		NA	NA	No	9861
16	87661072	9.07114e-06		JPH3	NR_073379	No	0
3	58406134	9.10409e-06		PXK	NM_001289098	No	0
3	52029119	9.19043e-06		RPL29	NM_000992	No	0
14	69938816	9.22543e-06		NA	NA	No	9709
11	118088137	9.23928e-06		JAML	NM_001286570	No	0
5	134582758	9.32732e-06		LINC02900	NR_037895	No	0
2	71066615	9.36297e-06		NA	NA	No	3662
14	106371490	9.42489e-06		NA	NA	No	12346
10	121545516	9.57096e-06		INPP5F	NM_014937	No	0
11	118964283	9.62433e-06		NA	NA	No	24
14	106329101	9.90494e-06		NA	NA	No	54735
The genomic coordinates are based on the human genome assembly hg19 (GRCh37). The p-value represents the significance after multiple testing correction, with Bonferroni-adjusted significant sites marked by an asterisk (*). The CpG Island column (Yes/No) indicates whether the site is located within a CpG island. The TSS Distance (bp) column represents the distance from the nearest transcription st…
