# Supplementary material for: Mapping the human epigenetic landscape across three generations: A DNA methylation resource from TMM BirThree
Source: Research Square preprint supplement (doi:10.21203/rs.3.rs-7314319/v1), 2025-08-20
Supplement: Supplementary file 8 [file ae2862783adcbcdda79287c7.xlsx]

## Sheet: 250411PBvsCP_smokingCpG
Supplementary Table 8. DNA methylation differences at smoking-associated CpG sites in adult peripheral blood and newborn cord blood samples.
chr	start	end	gene	Raw						Adujusted						P value
				Adult			Newborn			Adult			Newborn			AgeGroup		Smoking
				Ctr	Smk		M_Ctr	M_Smk		Ctr	Smk		M_Ctr	M_Smk
1	92947586	92947587	GFI1	78.7±11	67.4±14.5		77.1±13.7	72.4±15.5		78.3±11.1	68.8±13.7		76.9±13.2	72.9±15.3		0.8587		6.74e-10	*
1	92947588	92947589	GFI1	77.7±11.1	67.5±13.4		76.9±13.4	75.2±15.2		77.5±11	68.4±13.3		76.8±12.6	75.6±14.4		0.38254		4.06e-08	*
1	92947752	92947753	GFI1	42.1±11	33.4±12.4		49.3±14.7	49.5±15.9		41.9±10.8	34.1±11		49.4±13.4	49.2±14.6		4.21e-15	*	2.5e-06	*
1	206223050	206223051	NA	33.7±9.1	20.7±8.5		51.8±9.1	52.2±10.9		33.4±9.1	21.8±7.9		51.9±8.9	51.8±11		< 2e-16	*	< 2e-16	*
1	206223150	206223151	NA	62.2±10.8	42.2±15.3		73.5±7.7	73.4±6.6		61.8±11.2	43.8±13.9		73.5±7.6	73.4±6.7		< 2e-16	*	< 2e-16	*
1	206224334	206224335	AVPR1B	74.9±7.3	66.1±9.6		93.9±3.3	95.1±2.8		74.7±7.1	66.8±8.1		94±2.9	94.8±2.9		< 2e-16	*	< 2e-16	*
1	247702960	247702961	GCSAML	83.6±4.8	80.7±5.4		87.8±4.5	89.1±4.2		83.7±4.3	80.4±5.4		87.9±4.1	88.6±3.9		< 2e-16	*	1.34e-06	*
2	149824184	149824185	KIF5C	79.2±7.7	64.1±12.3		80.4±7.4	80.8±7.4		79±7.8	64.8±11.7		80.6±6.4	79.9±6.3		2.51e-08	*	< 2e-16	*
2	149824190	149824191	KIF5C	76.4±8.8	54.8±14.6		75.1±8.2	74±8.4		76±9.1	56±13.6		75.4±7.2	73±8.5		0.000877		< 2e-16	*
2	149824208	149824209	KIF5C	82.1±7.4	65.6±14.9		82.4±7	81.7±9		81.8±7.4	66.5±14.2		82.6±6	80.9±7.8		1.34e-05	*	< 2e-16	*
2	178125956	178125957	NFE2L2	29±6.8	23.1±7.7		60.6±7.8	59.7±8		28.8±6.6	23.8±6.6		60.6±7.8	59.5±7.4		< 2e-16	*	6.37e-09	*
2	220317977	220317978	SPEG	62.8±12.2	50.8±12.1		12.2±5.3	11.5±4.3		62.6±11.9	51.5±12		12.2±5.3	11.5±4.2		< 2e-16	*	2.72e-12	*
2	233246651	233246652	ALPP	84.1±7.2	72.4±11.9		69.4±10.1	70.3±10.1		83.8±7.3	73.4±11.7		69.4±9.7	70.3±10		< 2e-16	*	1.07e-14	*
2	233283010	233283011	NA	89.9±7.9	81.3±13.3		71.4±13.4	70±13.3		89.6±8	82.3±13.1		71.5±13.2	69.6±12.7		< 2e-16	*	2.72e-07	*
2	233283265	233283266	NA	49±8.7	41.6±8		30.8±8.3	31.5±8.7		48.9±8.4	42±8.1		30.8±8	31.6±8.6		< 2e-16	*	1.04e-07	*
2	233284446	233284447	NA	21.1±14	8.9±9		2.7±4.3	2.2±4.7		20.9±14	9.5±9.1		2.7±4.3	2.3±4.5		< 2e-16	*	1.09e-11	*
2	233284453	233284454	NA	26.7±15.1	12.7±11.8		3.8±5.3	5.5±6.3		26.4±15.2	13.8±11.7		3.9±5.2	5.2±6.4		< 2e-16	*	1.34e-10	*
2	233284501	233284502	NA	51.3±16.8	30.8±15.4		13±8.9	15.3±12.2		50.8±17	32.6±15		13±8.9	14.9±12.1		< 2e-16	*	1.14e-14	*
2	233284789	233284790	NA	43.8±18.4	23.5±16.7		4.2±7	4.5±6.9		43.2±18.2	25.7±15.8		4.2±6.9	4.6±7		< 2e-16	*	5.57e-13	*
2	233284840	233284841	NA	65±17.7	39.7±16.8		20.6±12.4	21.3±14		64.6±18.1	41.3±16		20.6±11.9	21.4±13.8		< 2e-16	*	< 2e-16	*
2	233284934	233284935	NA	70.2±15.2	51.6±14.7		27.5±15	28.4±13.4		69.8±15.3	53±14.7		27.6±14.8	27.8±12.9		< 2e-16	*	1.49e-13	*
2	233285012	233285013	NA	44.9±16	24.4±16.3		11±9.7	11.6±10		44.2±16.2	26.7±16		11±9.6	11.5±9.9		< 2e-16	*	9.27e-15	*
2	233285022	233285023	NA	37.7±15.6	20.9±14.8		10.1±10.3	8.2±8.1		37.3±15.8	22.1±14.6		10±9.9	8.7±8.3		< 2e-16	*	5.42e-13	*
3	98272097	98272098	NA	87.3±4.8	84.5±5.7		94±3.3	94±3.9		87.4±4.5	84.4±5.2		93.9±2.9	94.1±4		< 2e-16	*	1.65e-06	*
3	98274153	98274154	NA	90±4	84.6±5.6		94.7±3.3	94.9±3.1		90±4	84.9±5.4		94.8±3.1	94.7±2.9		< 2e-16	*	< 2e-16	*
5	373651	373652	AHRR	56.7±16.7	26.1±13.9		44.4±14.9	44.8±19.1		55.7±16.8	29.5±13.8		44.2±14.5	45.5±18.4		0.000497		< 2e-16	*
5	373653	373654	AHRR	56.1±17.1	28.3±14.1		42.5±16.7	42.7±17.9		55.3±17	31.2±13.4		42.6±16.2	42.3±17.8		4.1e-06	*	< 2e-16	*
5	408272	408273	AHRR	80.2±13.6	68±17.6		90.8±9.8	90.6±10.8		80.1±13.6	68.4±17.6		91±9.5	90.1±10.7		< 2e-16	*	9.67e-09	*
6	683927	683928	EXOC2	72±10.5	65.4±13.9		50.3±10.7	49.2±10.2		71.8±10.4	66.2±13.9		50.4±10.4	48.9±10.1		< 2e-16	*	0.000177	*
6	683940	683941	EXOC2	80.3±8.3	73.2±11.4		62.8±10.8	64.3±8.7		80.2±8.3	73.8±11.2		63±10.6	63.5±8.5		< 2e-16	*	7.61e-06	*
6	30720080	30720081	NA	77.2±7.8	61.9±14.5		95.7±3.2	95.9±3.7		76.8±8.1	63.4±13.9		95.8±2.8	95.5±3.5		< 2e-16	*	< 2e-16	*
7	145814670	145814671	CNTNAP2	72.1±8.4	62.7±11.4		67.5±8.7	69.2±8.4		71.9±8.4	63.7±11.4		67.6±8.6	68.9±8.1		0.011		3.01e-09	*
7	146334650	146334651	CNTNAP2	81.9±7	75±8.3		85.4±5.8	84±5.3		81.7±7	75.7±8.1		85.4±5.5	83.8±4.6		6.6e-12	*	1.38e-11	*
7	146334665	146334666	CNTNAP2	87.2±5.9	77.9±9.1		93.2±4.1	93.1±4.3		87±5.9	78.5±9		93.2±4	93.1±4.3		< 2e-16	*	< 2e-16	*
8	42040344	42040345	PLAT	28.9±11.6	15.4±9.6		50.8±12.2	50.2±12.6		28.5±11.6	17±8.8		50.7±12.1	50.4±12		< 2e-16	*	1e-12	*
8	42040349	42040350	PLAT	29.3±11.8	16±8.6		46.7±12.4	46±15		28.9±11.6	17.5±8		46.5±12.1	46.7±14.1		< 2e-16	*	3.89e-12	*
8	141801307	141801308	PTK2	43.4±7.9	37.5±6.7		63.1±7.1	60.4±6.5		43.4±7	37.5±6.7		63±5.9	61±6.3		< 2e-16	*	3.75e-12	*
9	75816100	75816101	NA	66.3±8.2	58±8.8		88.3±4.2	88.1±4.5		66.2±7.8	58.3±8.8		88.3±4.1	88±4.5		< 2e-16	*	3.57e-15	*
9	102067699	102067700	NA	86±7.3	83.8±7.7		93.5±5.3	93.4±5		86.2±6.5	83±7.5		93.7±5	92.9±4.8		< 2e-16	*	5.35e-05	*
9	127048842	127048843	NEK6	30.5±9.8	20±8.1		65.2±12.7	67.4±10.1		30.3±9.7	20.8±8.1		65.1±11.8	67.9±9.4		< 2e-16	*	5.43e-10	*
11	69477520	69477521	NA	93.8±3.1	85.9±8.3		97.7±1.5	97.9±1.6		93.6±3.3	86.8±7.9		97.8±1.4	97.9±1.6		< 2e-16	*	< 2e-16	*
11	69477522	69477523	NA	94.1±3.2	85.1±9.3		96.5±2.3	96.1±2		93.8±3.5	86.2±8.9		96.5±2.2	96.1±2		< 2e-16	*	< 2e-16	*
12	53613078	53613079	RARG	56.3±8.7	51.6±9.5		57.2±10.6	56.2±8.6		56.3±7.7	51.4±9.2		57.1±7	56.4±7.2		0.0267		2.88e-06	*
14	74224883	74224884	MIDEAS	67.9±8.1	60.6±9.9		78.3±6.9	79.1±6.8		67.8±8.1	60.9±9.8		78.3±6.6	79±6.5		< 2e-16	*	3.74e-09	*
17	78830659	78830660	RPTOR	32±8.7	24.6±7.8		74.1±8.4	74.2±6.1		31.8±8.7	25.1±7.7		74.1±7.8	74.4±5.9		< 2e-16	*	3e-09	*
17	78830673	78830674	RPTOR	26.5±7.8	18.1±8.1		67.1±8.6	68.2±8.6		26.4±7.8	18.6±7.7		67.1±7.8	68.3±7.2		< 2e-16	*	2.45e-12	*
17	78830726	78830727	RPTOR	66.3±9.6	61.9±8.8		80.4±7.4	79.8±5.6		66.4±9.3	61.6±8.8		80.5±7.3	79.6±5.4		< 2e-16	*	2.18e-05	*
18	3179889	3179890	MYOM1	56.5±7.2	48.7±8.8		30.7±6.7	28.2±5.8		56.2±7.2	49.9±8.6		30.6±6.5	28.5±5.6		< 2e-16	*	1.91e-10	*
19	17000336	17000337	F2RL3	57.5±15.4	39.6±15.1		62.1±13.8	61.3±11.9		56.8±15.6	41.8±14		62±13.5	61.8±11.5		1.09e-08	*	1.54e-12	*
19	17000346	17000347	F2RL3	33.1±13.4	16.2±11.3		34±14.9	30±13.1		32.5±13.4	18±11.5		33.9±14.5	30.2±13		0.004491		6.35e-16	*
19	17000390	17000391	F2RL3	69.2±13.5	39.8±18.9		80.8±13.5	82.7±9.3		68.2±14.2	43.2±17.4		81±13	82.1±9.3		< 2e-16	*	< 2e-16	*
19	17000413	17000414	F2RL3	42.5±16.2	23.3±14.8		58.6±16.3	53±13.5		41.8±16.3	25.7±14.6		58.6±15.7	52.9±13.3		< 2e-16	*	2.14e-15	*
19	17000415	17000416	F2RL3	41.2±15.4	21.8±13.3		61.2±16.5	59.2±18		40.6±15.5	24.1±13		61.2±15.9	59±16.8		< 2e-16	*	4.73e-15	*
19	49379057	49379058	PPP1R15A	45±16.6	32±17		73.5±14.5	70.6±15.2		44.4±16.4	33.9±16.1		73.7±14.2	70±15		< 2e-16	*	2.82e-07	*
19	49379145	49379146	PPP1R15A	46.8±14.3	35.8±14.1		67.9±12.7	72.2±13.2		46.4±13.7	37.4±14.1		68±12.3	72.1±12.9		< 2e-16	*	5.55e-05	*
19	49379177	49379178	PPP1R15A	42.5±14.5	30.3±14.6		63.6±13.9	67±12.2		42.2±14.2	31.6±14.3		63.8±13.2	66.1±12.4		< 2e-16	*	5.86e-07	*
22	39861490	39861491	MGAT3	88.1±4.2	83.9±5.6		85±4.7	83±5.2		88±4.2	84.3±5.6		84.9±4.6	83.1±5.1		5.02e-09	*	1.57e-10	*
22	39861509	39861510	MGAT3	83.3±5.1	77.6±7.1		76.5±6.4	76±6.8		83±5.1	78.5±6.9		76.6±5.7	75.6±6.9		< 2e-16	*	6.34e-09	*
22	39861574	39861575	MGAT3	58.8±8.2	49.7±10		50.5±8.1	48.5±9.8		58.4±8	51.1±10.1		50.6±7.2	48.2±9.4		7.21e-16	*	3.57e-11	*
This table summarizes DNA methylation levels (Mean±SD) at CpG sites associated with smoking exposure in four groups: adults without smoking exposure (Ctr), adults with current smoking exposure (Smk), newborns whose mothers did not smoke before pregnancy (M_Ctr), and newborns whose mothers smoked before pregnancy (M_Smk). Raw beta values represent unadjusted DNA methylation levels, while Adjusted …
