# Supplementary material for: Mapping the human epigenetic landscape across three generations: A DNA methylation resource from TMM BirThree
Source: Research Square preprint supplement (doi:10.21203/rs.3.rs-7314319/v1), 2025-08-20
Supplement: Supplementary file 9 [file c1d5db38bd6971ce419409b1.docx]

**Supplementary Methods**

1. **Cell Composition Estimation for Sequencing-Based DNA Methylation Data in Cord Blood**

To construct a reference-based cell-type composition estimation model optimized for sequencing-based DNA methylation data derived from neonatal cord blood, we generated whole-genome bisulfite sequencing (WGBS) data for purified nucleated red blood cells (nRBCs). Detailed experimental procedures for cord blood processing, nRBC isolation, DNA library preparation, and methylation profiling are described below.

**1.1 Cord blood collection and anonymisation**

An obstetrician-gynaecologist collected CB in a Venoject II blood collection tube (Terumo, Tokyo, Japan) immediately after caesarean delivery at IMU Hospital. Thereafter, the CB collection tube was transported from the hospital to the laboratory building. Here, it was anonymised on an independent PC that was not connected to the network. Immediately thereafter, the CB samples were transferred to the laboratory, where pretreatment for flow cytometry was performed within 60 min of blood collection.

**1.2 Pretreatment of cord blood before flow cytometry**

As pretreatment for flow cytometry, 15 mL anonymised CB was mixed with 15 mL autoMACS Rinsing Solution (Miltenyi, Bergisch Gladbach, Germany) to prepare a CB dilution solution. Thereafter, 30 mL of the solution was slowly added to a Lymphoprep Tube (Serumwerk Bernburg AG, Bernburg, Germany) and centrifuged at 800 × g for 20 min at 25 °C. Thereafter, the cord blood mononuclear cell (CBMC) layer was collected in a 15 mL tube. CBMCs were dispensed into at least four new 15 mL tubes of 1.0 × 107 cells each, and subsequently centrifuged at 400 × g for 10 min at 25 °C. The supernatant was removed with an aspirator and suspended in 100 μL 0.5% bovine serum albumin (BSA) solution. Human BD Fc Block (5 μL; 0.5 mg/mL, 0.25 mg, BD Biosciences, San Jose, CA, USA) was added to the cell suspension, vortexed using VORTEX-GENIE 2 Mixer (Thermo Fisher Scientific, Waltham, MA, USA), and incubated at 4 °C for 10 min. The 5 μL of florescent dye conjugated antibodies (Table 1) were added to the cell suspension and incubated at 4 °C for 30 min, shielded from light. Thereafter, 5 mL 0.5% BSA solution was added and centrifuged at 400 × g for 5 min at 25 °C. The supernatant was subsequently removed using an aspirator, and 2 mL 0.5% BSA solution was added to the suspension. Finally, the cell suspension was passed through a 30-micrometre Partec CellTrics filter (Sysmex Partec, Görlitz, Germany) and collected in 15 mL tubes.

**1.3 Flow cytometry**

Flow cytometry was conducted using a benchtop HS800 Cell Sorter (SONY Biotechnology, Tokyo, Japan) according to the manufacturer’s instructions. To isolate nRBCs from CB, a multistep gating procedure was performed in the cell sorter. First, we excluded debris (Figure 2A) and doublets (Figure 2B) using a light scattergram. Thereafter, we collected CD3-CD14-CD19-CD71+CD235+ cells (Figure 2C-F) using fluorochrome-conjugated monoclonal antibodies against CD3 (Cat.no.12-0038-42, eBioscience), CD14 (Cat.no.25-0149-42, eBioscience), CD19 (Cat.no. 56-0199-42, eBioscience), CD71 (Cat.no.17-0719-42, eBioscience), and CD235 (Cat.no.11-9886-42, eBioscience) (Figure 2C–F). Cell sorting was performed in purity mode, and cells were collected in 5 mL of 0.5% BSA solution. A total of 5 × 106 cells were collected. The number of CD71+ CD235+ cells among the collected cells was recorded for approximately 2000 events (Figure 2F), and the purity was calculated using the following formula:

**1.4 Smear test for nRBCs**

The ratio of nRBCs to sorted cells was evaluated using smear tests. A total of 1.0 × 106 cells were collected and centrifuged at 400 × g for 10 min at 25 °C, and the supernatant was removed. Thereafter, the cells were suspended in 500 µL ice-cold 4% paraformaldehyde-phosphate buffer and fixed for 1 min. The cells were washed twice with phosphate-buffered saline (PBS) and resuspended in 50 μL PBS. The cell suspension was placed on MAS-coated glass slides (Matsunami, Tokyo, Japan), allowed to dry, and cover-slipped with DAPI-containing VECTASHIELD Mounting Medium (Vector Laboratories, Burlingame, CA, USA). The DAPI-positive cells were observed and counted under the Zeiss Axio Observer Z1 microscope (Carl Zeiss SMT GmbH, Oberkochen, Germany) using the 10× objective lens. Images containing at least 1,000 cells were selected using ImageJ software, and the total number of cells and DAPI-positive cells were counted. nRBC content was calculated using the following formula:

**1.5 DNA extraction and preparation of sequencing libraries**

DNA was extracted using the DNeasy Blood and Tissue Kit (Qiagen, Hilden, Germany) according to the manufacturer’s instructions. Aliquots of 300 ng genomic DNA (gDNA), eluted in 50 μL of TE buffer, were sheared into 350 bp fragments using a Covaris LE220 Focused-ultrasonicator (Thermo Fisher Scientific). Quality check of the fragmented gDNA was conducted using an Agilent 2200 TapeStation Instrument (Agilent Technologies). Aliquots of 150 ng fragmented gDNA were treated with the bisulfite reagent EZ DNA Methylation Kit (Zymo Research, Irvine, CA, USA). Libraries were prepared from 10 ng bisulfite-treated gDNA using an Accel-NGS Methyl-Seq Kit (Swift Biosciences, Inc., Ann Arbor, MI, USA) according to the manufacturer’s instructions. Four libraries were produced per sample to ensure complexity.

**1.6 Whole genome bisulfite sequencing and statistics analyses**

WGBS libraries containing 20% phiX were sequenced on the Illumina HiSeq X Five sequencer (paired-end 150 bp reads). All statistical analyses were conducted using the Tohoku Medical Megabank Organization (ToMMo) Supercomputer System. Illumina adaptor sequences and reads <20 bp were removed from raw WGBS data using Trim Galore v0.6.5. The remaining sequences were mapped onto the human reference genome GRCh37 using NovoAlign v4.02.02, and duplicate amplicons were removed using SAMtools v1.3.1. Overlapping paired-end reads were clipped using BamUtil v1.0.13. DNAm levels (% DNAm) in the detectable CpGs were calculated using NovoMethyl v1.07. Of the detected CpGs, <6× and >300× read depths were excluded from the detailed analysis.

**1.7 Comparison of DNAm profiles among various blood cells and nRBCs**

To reveal the characteristics of the DNAm profiles of nRBCs, we compared the DNAm profiles of various mature blood cells (such as monocytes and CD4+ T lymphocytes) in our publicly available multi-omics database iMETHYL19. Summarised DNAm data for nRBCs have already been published in the iMETHYL database. Two WGBS erythroblast (EB) datasets (ERS358627 and ERS433774) were obtained from the International Human Epigenome Consortium (IHEC) Data Portal (https://epigenomesportal.ca/ihec/). CpGs with DNAm levels detected in all samples were used to compare the DNAm profiles using principal component analysis (PCA). However, CpGs with a standard deviation (SD) of zero for DNAm levels were excluded.

**Supplemental Figure Legends**

**Supplemental Figure 1.** Overview of participant combinations in the Hepta-family DNA methylation dataset.This figure summarizes the family-based combinations included in the DNA methylation dataset, which consists of 1,093 individuals from 158 Hepta-families spanning three generations. Each family includes a newborn (N), parents (M = mother, F = father), and four grandparents (maternal grandmother [MGM], maternal grandfather [MGF], paternal grandmother [PGM], and paternal grandfather [PGF]). The numbers of available pairs, trios, and couples are indicated to illustrate the structure and completeness of familial relationships within the dataset.

**Supplemental Figure 2.** Functional enrichment of CpG sites contributing to principal component (PC) 1 and PC2. (A) Scree plot showing the proportion of variance explained by the top 10 PCs derived from DNA methylation data across all 1,093 individuals. (B) Density plots of loading scores for PC1 (*left*) and PC2 (*right*). CpG sites contributing to PCs were defined as those with absolute loading scores ≥ 0.4, and associated genes were annotated based on genomic proximity. (C) Dotplots showing the top 10 enriched Gene ontology Biological Process terms for PC1-related genes (*upper*) and PC2-related genes (*lower*). Dot size represents the number of genes annotated to each GO term, and color represents the adjusted p-value. (D) Tissue-specific expression enrichment analysis for genes related with PC1- (*upper*) and PC2-related CpG sites (*lower*), based on publicly available RNA-seq data.

**Supplemental Figure 3.** Principal component analysis (PCA) of DNA methylation profiles in various blood cell types and nRBCs. PCA was conducted to compare DNA methylation (DNAm) profiles among nucleated red blood cells (nRBCs), erythroblasts (EBs), 155 neonatal cord blood (CB) samples generated in this study, and mature blood cell types. DNAm data for mature cells, including monocytes, CD4⁺ T cells, CD8⁺ T cells, B cells, natural killer (NK) cells, and neutrophils (Neu), were obtained from the publicly available iMETHYL multi-omics database. Two whole-genome bisulfite sequencing (WGBS) datasets of erythroblasts (ERS358627 and ERS433774) were retrieved from the International Human Epigenome Consortium (IHEC) Data Portal. Only CpG sites with detected methylation levels across all samples and non-zero standard deviation were included in the PCA. The first two principal components (PC1 and PC2), which explain 24.9% and 6.8% of the variance, respectively, demonstrate distinct clustering by cell type, with nRBCs forming a clearly separated group.

**Supplemental Figure 4.** Estimated cell-type composition in peripheral and cord blood samples. (A) Cell-type composition was estimated in 938 adult peripheral blood (PB) and 155 neonatal cord blood (CB) samples from the Hepta-family cohort using a new estimation model for CB. This model incorporated newly generated WGBS data for nucleated red blood cells (nRBCs) to enable accurate estimation in cord blood. Seven blood cell types were assessed: neutrophils (Neu), monocytes (Mono), natural killer (NK) cells, CD4⁺ T cells, CD8⁺ T cells, B cells, and nRBCs. (B) Neutrophils were the most abundant cell type in both PB and CB (69.7 ± 10.3% vs. 54.9 ± 9.8%, respectively). As expected, nRBCs were nearly absent in PB (0.6 ± 0.8%) but present at significant levels in CB (12.8 ± 3.6%), with the difference reaching statistical significance (t-test, p < 0.05). Cell-type-specific coefficient sets for both CB and PB models are available via the iMETHYL database.

**Supplemental Figure 5.** Epigenome-wide association study (EWAS) results for maternal pre-pregnancy smoking using adult-based cell-type composition estimates. (A) Manhattan plot and (B) quantile–quantile (QQ) plot show the EWAS results using neonatal cord blood DNA methylation data and maternal smoking status before pregnancy, with cell-type composition estimated by a conventional adult peripheral blood model. In the Manhattan plot, two horizontal dotted lines represent significance thresholds: the upper dotted line indicates the Bonferroni-corrected genome-wide threshold (p < 5.0 × 10⁻⁸), and the lower dotted line indicates the suggestive threshold (p < 1.0 × 10⁻⁵). The QQ plot shows moderate inflation (λ = 1.027; 95% CI: 1.023–1.032). A total of 9 CpG sites surpassed the suggestive threshold.
