# Supplementary material for: Mapping the human epigenetic landscape across three generations: A DNA methylation resource from TMM BirThree
Source: Research Square preprint supplement (doi:10.21203/rs.3.rs-7314319/v1), 2025-08-20
Supplement: Supplementary file 10 [file c4fa81e3ffcc7ddf1f622b12.xlsx]

## Sheet: SupTable7
Supplemental Table 7. Differentially methylated CpG sites with p < 1×10⁻5 in the smoking cessation EWAS (Grandparental EWAS2) using DNA from 500 grandparents
Chromosome	Position	p-value		Gene	RefSeq ID	CpG Island	TSS Distance (bp)
2	233285012	7.51826e-10	*	NA	NA	Yes	9588
2	149824190	1.21785e-08	*	KIF5C	NM_004522	No	0
11	69477522	1.26856e-08	*	NA	NA	No	2808
6	30720080	5.38578e-08		NA	NA	No	7753
2	233284427	4.77757e-07		NA	NA	Yes	9003
11	69477520	7.84558e-07		NA	NA	No	2810
2	162101259	9.70907e-07		LINC01806	NR_110163	No	0
9	138476868	2.00721e-06		LINC01502	NR_109814	No	0
2	95787294	2.90104e-06		MRPS5	NM_031902	Yes	0
1	206223050	3.69468e-06		NA	NA	No	1231
2	149824184	4.51256e-06		KIF5C	NM_004522	No	0
2	233284446	4.52191e-06		NA	NA	Yes	9022
1	3118315	4.56489e-06		PRDM16	NM_199454	No	0
5	373653	5.11477e-06		AHRR	NM_001242412	No	0
19	246835	5.2512e-06		NA	NA	No	34203
3	58572975	5.37606e-06		FAM107A	NM_001282714	No	0
9	138478604	5.71643e-06		LINC01502	NR_109814	No	0
19	17000390	6.85707e-06		F2RL3	NM_003950	No	0
3	98237750	7.23691e-06		CLDND1	NM_001040183	No	0
2	149824208	7.33143e-06		KIF5C	NM_004522	No	0
19	45947905	7.44293e-06		NA	NA	Yes	20728
5	137385251	8.34152e-06		NA	NA	No	16449
13	28987265	8.70824e-06		FLT1	NM_001160031	No	0
7	100348988	9.23576e-06		ZAN	NM_173059	No	0
2	233284453	9.40796e-06		NA	NA	Yes	9029
21	47604654	9.53705e-06		NA	NA	No	281
14	107253659	9.61181e-06		NA	NA	No	302130
The genomic coordinates are based on the human genome assembly hg19 (GRCh37). The p-value represents the significance after multiple testing correction, with Bonferroni-adjusted significant sites marked by an asterisk (*). The CpG Island column (Yes/No) indicates whether the site is located within a CpG island. The TSS Distance (bp) column represents the distance from the nearest transcription st…
