# Supplementary material for: Mapping the human epigenetic landscape across three generations: A DNA methylation resource from TMM BirThree
Source: Research Square preprint supplement (doi:10.21203/rs.3.rs-7314319/v1), 2025-08-20
Supplement: Supplementary file 11 [file fbbdac29858d58db97d5511e.xlsx]

## Sheet: SupTable4
Supplemental Table 4. Differentially methylated CpG sites with p < 1×10⁻5 in the maternal smoking EWAS (Neonatal EWAS1) using DNA from 145 newborns
Chromosome	Position	p-value		Gene	RefSeq ID	CpG Island	TSS Distance (bp)
3	126195365	5.60507e-09	*	NA	NA	Yes	603
4	74371123	7.04675e-07		NA	NA	No	1405
9	117457303	1.69632e-06		NA	NA	No	12934
1	19414438	1.98062e-06		UBR4	NM_020765	No	0
6	91796021	2.13809e-06		NA	NA	No	435355
16	57817959	2.35977e-06		KIFC3	NM_001130100	No	0
16	21525978	4.67904e-06		NA	NA	No	3250
1	235123475	5.55266e-06		NA	NA	No	149181
11	17741349	5.6315e-06		MYOD1	NM_002478	Yes	0
9	139011849	5.9693e-06		NA	NA	No	1118
4	4399045	6.33088e-06		NSG1	NM_001287764	No	0
7	36007555	6.86659e-06		NA	NA	Yes	60840
22	24890515	8.38235e-06		ADORA2A-AS1	NR_028483	Yes	0
12	2457552	9.35047e-06		CACNA1C	NM_001129833	No	0
The genomic coordinates are based on the human genome assembly hg19 (GRCh37). The p-value represents the significance after multiple testing correction, with Bonferroni-adjusted significant sites marked by an asterisk (*). The CpG Island column (Yes/No) indicates whether the site is located within a CpG island. The TSS Distance (bp) column represents the distance from the nearest transcription st…
